# Supplementary material for: Temporal Changes in Extracellular Vesicle Hemostatic Protein Composition Predict Favourable Left Ventricular Remodeling after Acute Myocardial Infarction
Source: MDPI journal article supplement (doi:10.3390/ijms24010327), 2022-12-25
Supplement: s1 [file s1]

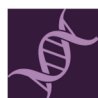

## Supplemental Data

# Temporal changes in extracellular vesicle hemostatic protein composition predict favourable left ventricular remodeling after acute myocardial infarction

Xiong Chang Lim<sup>1</sup>, Chenyuan Huang<sup>1,2</sup>, Siti Maryam J.M. Yatim<sup>1,2</sup>, Suet Yen Chong<sup>1,2</sup>, Sock Hwee Tan<sup>2,3</sup>, Xiaoxun Yang<sup>2,3</sup>, Caryn L. Heldt<sup>4</sup>, Jodi Pedersen<sup>4</sup>, Michael Talanker<sup>4</sup>, Harshvardhan Modh<sup>5</sup>, Matthias G. Wacker<sup>5</sup>, Giorgia Pastorin<sup>5</sup>, Siew Pang Chan<sup>2,3</sup>, A. Mark Richards<sup>2,3,6</sup>, Chris J. Charles<sup>1,2,6</sup>, Mark Y. Chan<sup>2,3,\*</sup>, Jiong-Wei Wang<sup>1,2,7,8,\*</sup>

<sup>1</sup> Department of Surgery, Yong Loo Lin School of Medicine, National University of Singapore, Singapore, Singapore

<sup>2</sup> Cardiovascular Research Institute (CVRI), National University Heart Centre Singapore (NUHCS), Singapore, Singapore

<sup>3</sup> Department of Medicine, Yong Loo Lin School of Medicine, National University of Singapore, Singapore, Singapore

<sup>4</sup> Department of Chemical Engineering, Michigan Technological University, Houghton, Michigan, USA

<sup>5</sup> Department of Pharmacy, Faculty of Science, National University of Singapore, Singapore, Singapore

<sup>6</sup> Christchurch Heart Institute, Department of Medicine, University of Otago, Christchurch, New Zealand

<sup>7</sup> Department of Physiology, Yong Loo Lin School of Medicine, National University of Singapore, Singapore, Singapore

<sup>8</sup> Nanomedicine Translational Research Programme, Centre for NanoMedicine, Yong Loo Lin School of Medicine, National University of Singapore, Singapore, Singapore

\* Correspondence: mark\_chan@nuhs.edu.sg (M.Y.C.); surwang@nus.edu.sg (J.-W.W.)

### Supplemental Tables

**Table S1.** Baseline and follow-up LDL-EVs protein levels in patients

| LDL-EVs<br>Protein<br>Levels<br>[log (pg/mL)] | Post-AMI                        |                            |                            |                                  |                            |                            |
|-----------------------------------------------|---------------------------------|----------------------------|----------------------------|----------------------------------|----------------------------|----------------------------|
|                                               | Adverse LV Remodeling<br>n = 98 |                            |                            | Reverse LV Remodeling<br>n = 100 |                            |                            |
|                                               | Baseline                        | 1 month                    | 6 months                   | Baseline                         | 1 month                    | 6 months                   |
| <b>Coagulation Protein</b>                    |                                 |                            |                            |                                  |                            |                            |
| VWF                                           | 14.32<br>(13.70-<br>14.94)      | 13.99<br>(13.33-<br>14.50) | 13.77<br>(13.26-<br>14.18) | 14.44<br>(13.91-<br>15.04)       | 14.09<br>(13.64-<br>14.68) | 14.26<br>(13.63-<br>14.66) |
| SerpinC1                                      | 17.79<br>(17.52-<br>18.16)      | 17.67<br>(17.46-<br>18.08) | 17.66<br>(17.38-<br>18.06) | 17.79<br>(17.54-<br>18.23)       | 17.81<br>(17.55-<br>18.17) | 17.85<br>(17.63-<br>18.22) |
| <b>Fibrinolytic Protein</b>                   |                                 |                            |                            |                                  |                            |                            |
| Plasminogen                                   | 13.68<br>(13.32-<br>13.99)      | 13.85<br>(13.45-<br>14.19) | 13.89<br>(13.49-<br>14.29) | 13.56<br>(13.11-<br>14.12)       | 13.32<br>(12.89-<br>13.92) | 13.36<br>(12.98-<br>14.10) |

Data are presented as median  $\pm$  IQR. Abbreviation: LDL, low density lipoprotein; EV, extracellular vesicles; AMI, acute myocardial infarction.

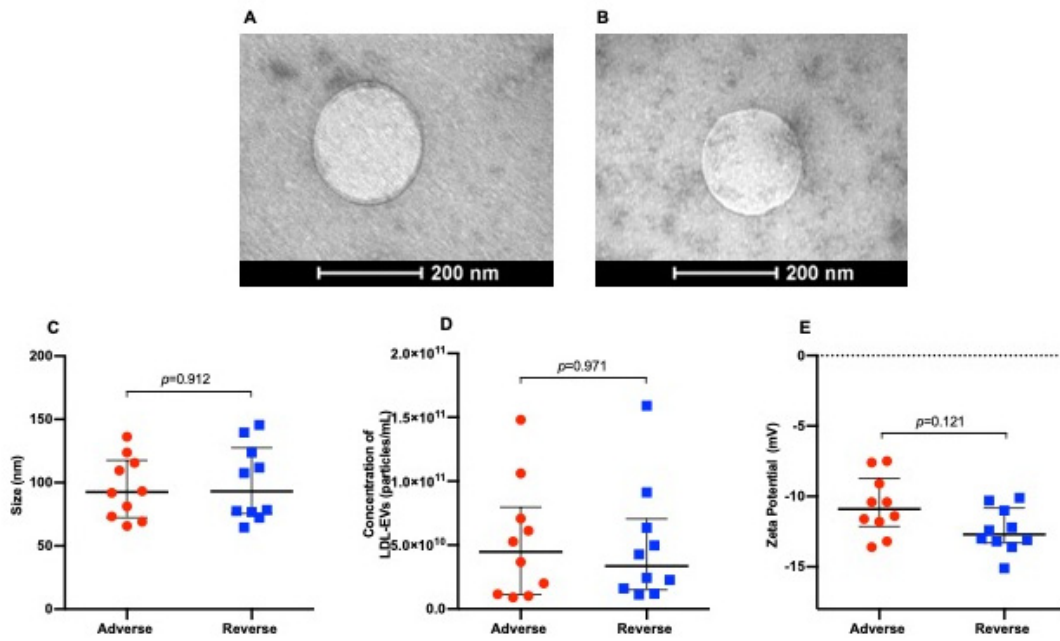

**Figure S1. Characterization of LDL-EVs of post-AMI patients with adverse and reverse LV remodeling.** **A:** TEM image of LDL-EV from patient with adverse LV remodeling. **B:** TEM image of LDL-EV from patient with reverse LV remodeling. **C, D, E:** Size, concentration, and zeta potential of LDL-EVs of 20 post-AMI patients (n=10 adverse LV remodeling and n=10 reverse LV remodeling) at baseline. Differences in characteristics between patients with adverse LV remodeling and reverse LV remodeling were established by Mann-Whitney U test.
